# Supplementary material for: Upregulation of Mlxipl induced by cJun in the spinal dorsal horn after peripheral nerve injury counteracts mechanical allodynia by inhibiting neuroinflammation
Source: publisher site journal article supplement (doi:10.18632/aging.103313), 2020-06-09
Supplement: Supplementary file [file aging-v12i11-103313-supplementary-material-SD1.pdf]

**SUPPLEMENTARY FIGURES**

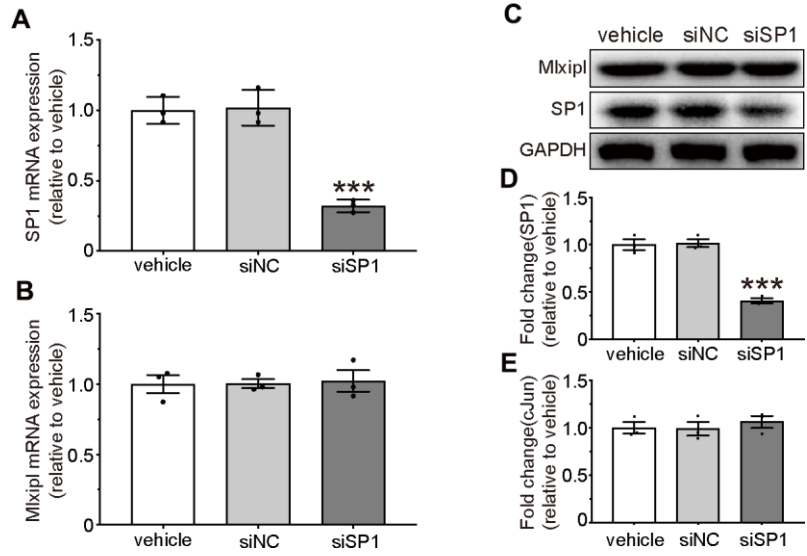

**Supplementary Figure 1. Knockdown of SP1 did not significantly inhibit the mRNA and protein expression of Mlxipl.** QPCR (A–B) and western blot (C) were performed to detect the expression of SP1 and Mlxipl. Primary microglia were co-transfected with siSP1 or negative control siRNA for 48 hr. Quantification of the western blot (D–E). Data relative to vehicle. N = 3. \*\*\*P < 0.001 vs. vehicle.

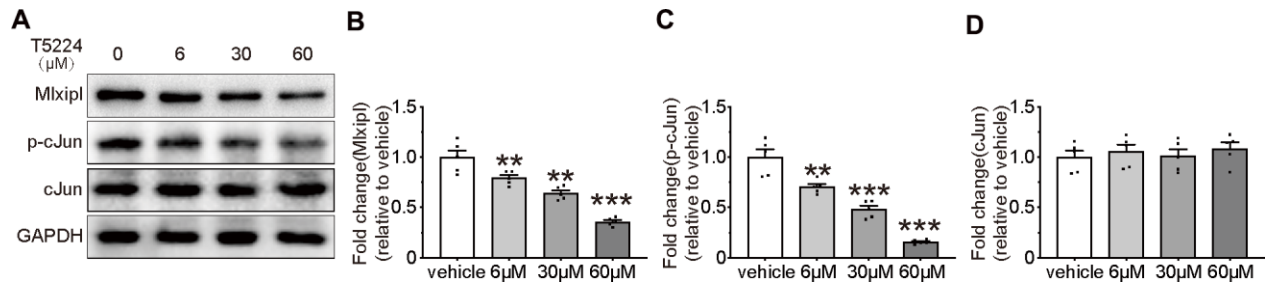

**Supplementary Figure 2. T5224 inhibited the expression of p-cJun and Mlxipl.** Western blot was performed to detect the expression of target genes. Primary microglia were co-transfected with T5224 for 48 hr. Quantification of the western blot (D–E). Data relative to vehicle. N = 3. \*\*\*P < 0.001, \*\*P < 0.05, \*P < 0.01 vs. vehicle.
